# Supplementary material
Source: PubMed Central journal article supplement (PMC7154514)
Supplement: mmc1.pdf [file mmc1.pdf]

**Cell Host & Microbe, Volume 27**

## **Supplemental Information**

### **Genome Composition and Divergence of the Novel**

#### **Coronavirus (2019-nCoV) Originating in China**

**Aiping Wu, Yousong Peng, Baoying Huang, Xiao Ding, Xianyue Wang, Peihua Niu, Jing Meng, Zhaozhong Zhu, Zheng Zhang, Jiangyuan Wang, Jie Sheng, Lijun Quan, Zanxian Xia, Wenjie Tan, Genhong Cheng, and Taijiao Jiang**

## **Supplemental Information**

### **Genome composition and divergence of the novel coronavirus (2019-nCoV) originating in China**

Aiping Wu, Yousong Peng, Baoying Huang, Xiao Ding, Xianyue Wang, Peihua Niu, Jing Meng,  
Zhaozhong Zhu, Zheng Zhang, Jiangyuan Wang, Jie Sheng, Lijun Quan, Zaxian Xia, Wenjie Tan,  
Genhong Cheng, Taijiao Jiang

Figure S1

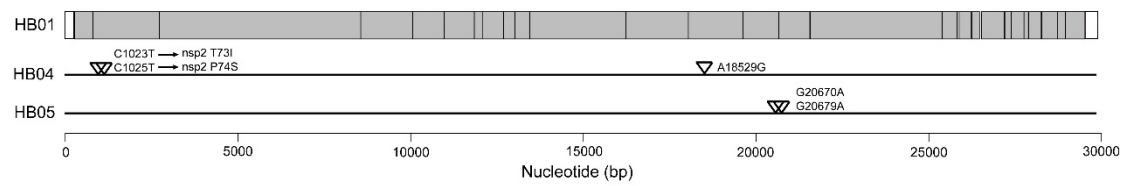

**Figure S1.** The nucleotide differences (labeled as triangles) of HB04 (short for Wuhan/IVDC-HB-04/2019) and HB05 (Wuhan/IVDC-HB-05/2019) relative to HB01 (Wuhan/IVDC-HB-01/2019) across the viral genomes. Two amino acid substitutions on nsp2 protein were observed between the HB04 and HB01.

Figure S2.

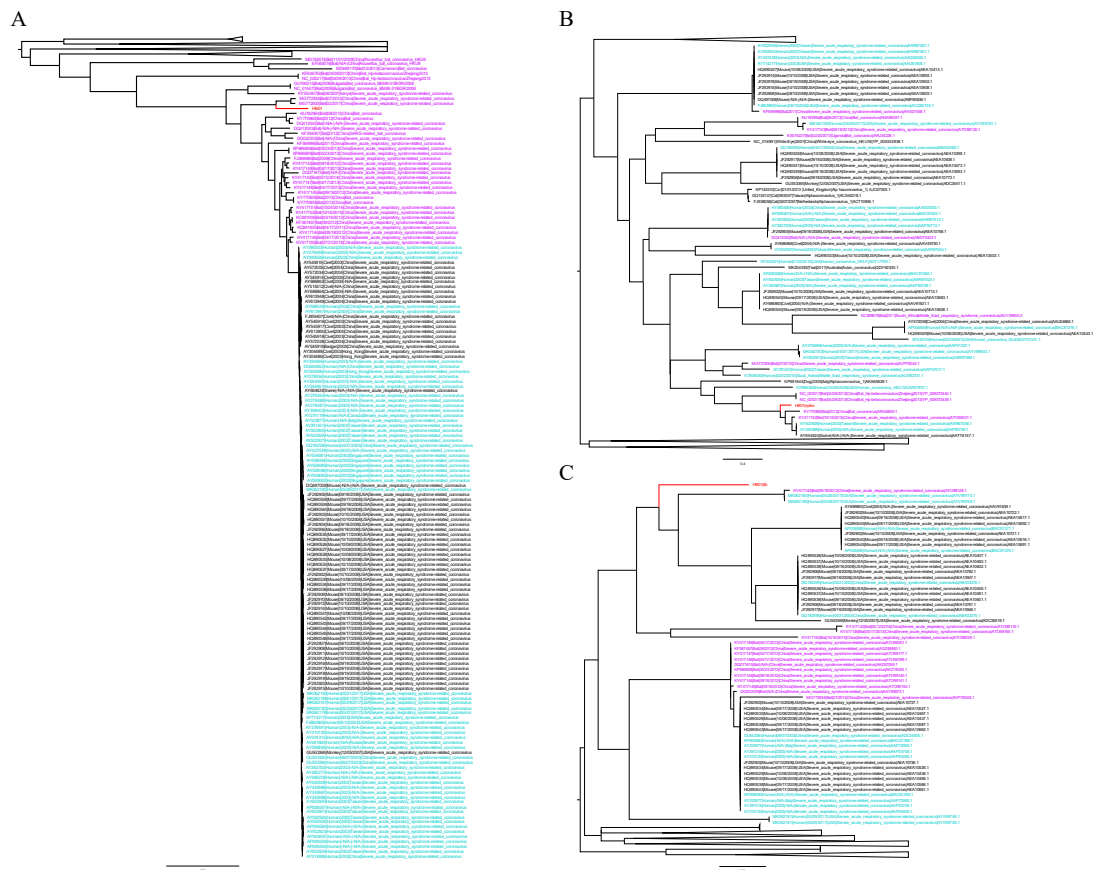

**Figure S2.** Phylogenetic trees for the whole genome, spike and 8b proteins of 2019-nCoV and related coronaviruses. The coronavirus species were colored in the same way as figure 1B. The phylogenetic tree for the whole genome was constructed using the Molecular Evolutionary Genetics Analysis (MEGA) by the maximum likelihood

method under the General Time Reversible (GTR) nucleotide substitution model with the bootstrap tests (500 replicates), while the phylogenetic trees for the individual genes were constructed by the Fasttree software with the GTR nucleotide substitution model as well.
